# Supplementary material for: Detection of serum CC16 by a rapid and ultrasensitive magnetic chemiluminescence immunoassay for lung disease diagnosis
Source: publisher site journal article supplement (doi:10.1515/cclm-2024-0724), 2024-07-28
Supplement: Supplementary file 1 [file j_cclm-2024-0724_suppl_001.docx]

**SUPPLEMENTAL DATA**

**Detection of serum CC16 by a rapid and ultrasensitive magnetic chemiluminescence immunoassay for lung disease diagnosis**

**Kaili Duana,#, Yu Xiangb,# , Yilong Dengc, Junman Chena,*, Ping Liua,***

a Key Laboratory of Clinical Laboratory Diagnostics (Ministry of Education), College of Laboratory Medicine, Chongqing Medical University, Chongqing, 400016, China.

b Department of Laboratory Medicine, The First Affiliated Hospital of Chongqing Medical University, Chongqing, 400016, China

c Bioscience (Tianjin) Diagnostic Technology CO., LTD, Tianjin, 300399, China.

# Kaili Duan and Yu Xiang contributed equally to this work.

***Address correspondence to:**

Ping Liu, Ph.D. College of Laboratory Medicine, Chongqing Medical University, 1 Medical College Rd., Chongqing 400016, China; E-mail: 20098181@163.com.

Junman Chen, Ph.D. College of Laboratory Medicine, Chongqing Medical University, 1 Medical College Rd., Chongqing 400016, China; E-mail: junman816@163.com.

Tel: +86-23-68485688; Fax: +86-23-68485786.

**REAGENT AND MATERIAL**

BL21 (DE3) conpetent cells, Kanamycin, Luria-Bertani (Beyotime, Shanghai, China); Isopropyl β-D-thiogalactoside (Detai, Nanjing, China); Horseradish peroxidase, Ni-NTA chromatography kit (Thermo Fisher Scientific, MA, USA); Alkaline phosphatase, Polyethylene glycol (Med Chem Express, NJ, USA); 3,3',5,5'-tetramethylbenzidine, horseradish peroxidase-conjugated goat anti-mouse immunoglobulin (IgG) (Sigma-Aldrich, MO, USA); SF-510 microplate reader (Rarto, Shenzhen, China); Axceed 260 immunoassay analyzer (Bioscience, Tianjin, China); Human serum CC16 ELISA kit (BioVendor, Brno, Czech Republic)

**SUPPLEMENTAL FIGURES**


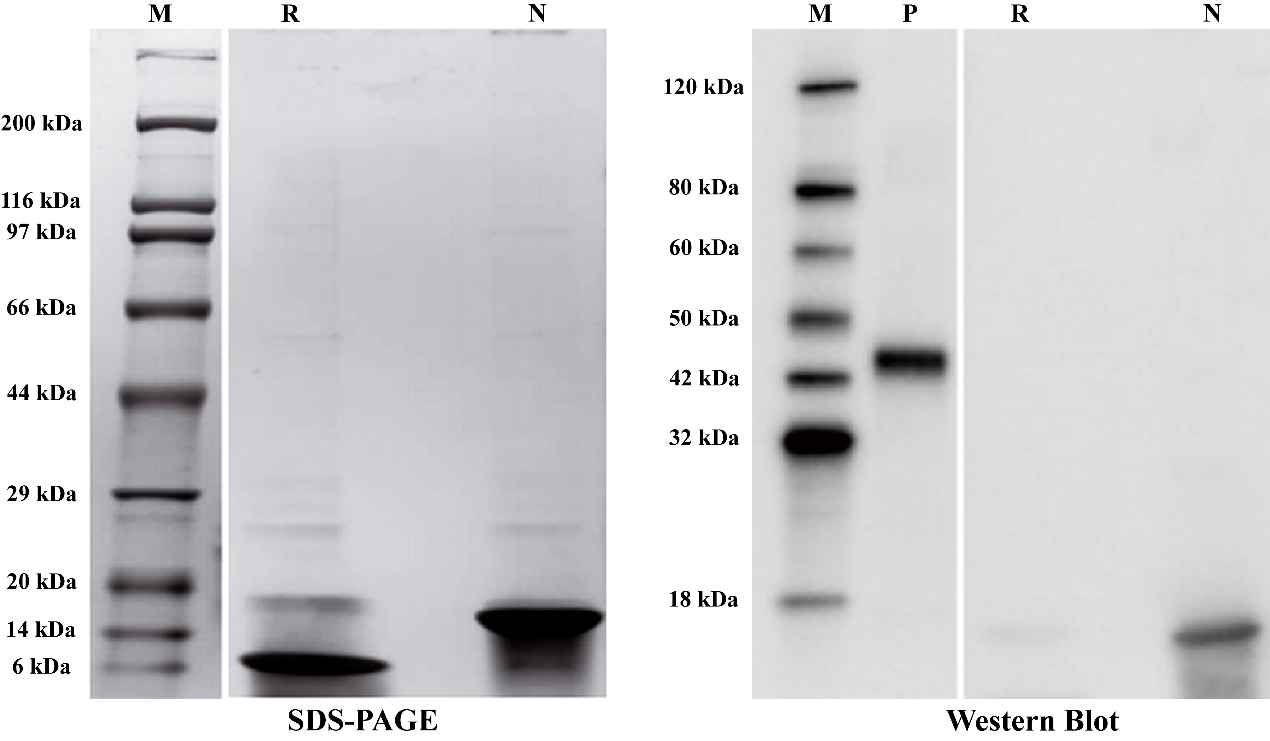
 **Figure. S1.** SDS-PAGE and western blot analysis of recombinant CC16 under reducing and non-reducing (native) conditions. Lane M: Protein Marker, Lane R: Reducing condition, Lane N: Non-reducing condition, Lane P: Multiple-tag as positive control.

**
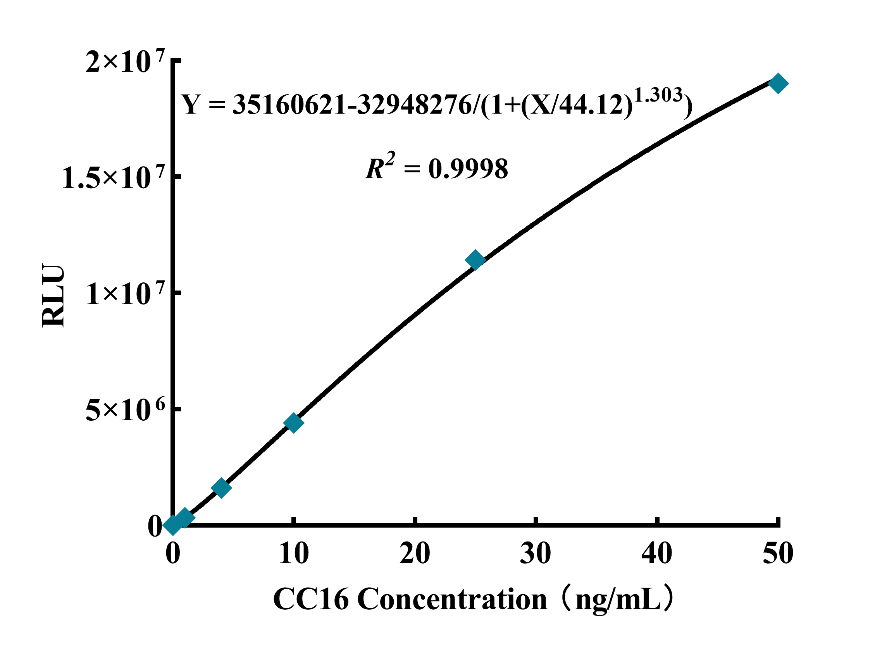
**

**Figure. S2.** Standardized curve chart. The horizontal coordinate represents the concentration of CC16 calibrators, and the vertical coordinate represents the RLU.

**SUPPLEMENTAL TABLES**

**Table S1. Class-subclass-type assay of MAbs**.

| **Subclasses** | **Cell Lines** | | | |
| --- | --- | --- | --- | --- |
| IgG2b | 1C3 | 1G7 | 5C3 | 2A3 |
| IgG1 | 4H4 | 7G7 | 9F6 |  |
| IgG2a | 2C1 | 1E1 | 6E4 |  |

**Table S2. Epitope identification.**

| **Epitope** | **A** | | **B** | | **C** | |
| --- | --- | --- | --- | --- | --- | --- |
| Cell Lines | 1E1 | 1C3 | 1G7 | 4H4 | 5C3 | 7G7 |
| 6E4 | 9F6 | 2A3 |  | 2C1 |  |

**Table S3. Contingency table**

|  | **ELISA** | **MNPs-CLIA** | | | **Concordance rate** |
| --- | --- | --- | --- | --- | --- |
| Low level | Medium-high level | Total |
| κ=0.877 | Low level | 63 | 4 | 67 | 93.8%, (63+59)/130 |
| Medium-high level | 4 | 59 | 63 |
| Total | 67 | 63 | 130 |

Cohen's kappa analysis is suitable for evaluating consistency between two observers and calculated as follows:

where κ is the kappa value and *p* and *q* are the sample frequencies. According to McHugh [1], the kappa result should be interpreted as follows: 0-0.20 as indicating no agreement, 0.21-0.39 as minimal agreement, 0.40-0.59 as weak agreement, 0.60-0.79 as moderate agreement, 0.80-0.90 as strong agreement, and 0.91-1.00 as almost perfect agreement.

**Table S4. The comparison between the proposed method and other methods.**

| **Methods** | **Linear range (ng/mL)** | **LOD (ng/mL)** | **CV (%)** |
| --- | --- | --- | --- |
| LAT[2] | 0.5-20 | 0.500 | 5-10 |
| ELISA[3] | 0.0625-4 | 0.038 | <10 |
| MNPs-CLIA | 0.2-50 | 0.037 | <5 |

**Table S5. Clinical detailed information of pulmonary patients**

| **Sample number** | **Gender** | **Age** | **Sample type** | **Clinical diagnosis** | **Diagnostic criteria** | **CC16 level (ng/mL)** | **Sample number** | **Gender** | **Age** | **Sample type** | **Clinical diagnosis** | **Diagnostic criteria** | **CC16 level (ng/mL)** |
| --- | --- | --- | --- | --- | --- | --- | --- | --- | --- | --- | --- | --- | --- |
| S#1 | Male | 46 | Serum | Healthy | Health examination | 20.9 | S#13 | Male | 72 | Serum | Healthy | Health examination | 12.5 |
| S#2 | Male | 52 | Serum | Healthy | Health examination | 15.5 | S#14 | Female | 59 | Serum | Healthy | Health examination | 14.9 |
| S#3 | Female | 56 | Serum | Healthy | Health examination | 16.8 | S#15 | Male | 49 | Serum | Healthy | Health examination | 17.5 |
| S#4 | Male | 37 | Serum | Healthy | Health examination | 13.6 | S#16 | Male | 45 | Serum | Healthy | Health examination | 19.2 |
| S#5 | Female | 39 | Serum | Healthy | Health examination | 18.7 | S#17 | Male | 38 | Serum | Healthy | Health examination | 7.9 |
| S#6 | Female | 45 | Serum | Healthy | Health examination | 15.4 | S#18 | Female | 67 | Serum | Healthy | Health examination | 12.5 |
| S#7 | Female | 29 | Serum | Healthy | Health examination | 20.4 | S#19 | Male | 34 | Serum | Healthy | Health examination | 20.5 |
| S#8 | Female | 45 | Serum | Healthy | Health examination | 16.8 | S#20 | Male | 37 | Serum | Healthy | Health examination | 11.3 |
| S#9 | Female | 55 | Serum | Healthy | Health examination | 12.8 | S#21 | Male | 54 | Serum | Healthy | Health examination | 15.7 |
| S#10 | Female | 53 | Serum | Healthy | Health examination | 14.8 | S#22 | Female | 40 | Serum | Healthy | Health examination | 12.8 |
| S#11 | Male | 59 | Serum | Healthy | Health examination | 11.1 | S#23 | Male | 59 | Serum | Healthy | Health examination | 13.60 |
| S#12 | Female | 62 | Serum | Healthy | Health examination | 16.8 | S#24 | Male | 43 | Serum | Healthy | Health examination | 14.8 |
| S#25 | Female | 67 | Serum | Healthy | Health examination | 15.8 | S#38 | Male | 62 | Serum | Healthy | Health examination | 13.4 |
| S#26 | Male | 46 | Serum | Healthy | Health examination | 13.7 | S#39 | Male | 63 | Serum | Healthy | Health examination | 14.6 |
| S#27 | Female | 53 | Serum | Healthy | Health examination | 11.6 | S#40 | Female | 42 | Serum | Healthy | Health examination | 19.3 |
| S#28 | Female | 46 | Serum | Healthy | Health examination | 8.9 | S#41 | Male | 45 | Serum | Healthy | Health examination | 16.1 |
| S#29 | Male | 51 | Serum | Healthy | Health examination | 17.9 | S#42 | Female | 62 | Serum | Healthy | Health examination | 12.2 |
| S#30 | Male | 57 | Serum | Healthy | Health examination | 6.9 | S#43 | Male | 59 | Serum | Healthy | Health examination | 10.8 |
| S#31 | Male | 62 | Serum | Healthy | Health examination | 17.3 | S#44 | Female | 39 | Serum | Healthy | Health examination | 16.4 |
| S#32 | Female | 68 | Serum | Healthy | Health examination | 7.9 | S#45 | Male | 47 | Serum | Healthy | Health examination | 8.6 |
| S#33 | Male | 37 | Serum | Healthy | Health examination | 11.3 | S#46 | Female | 41 | Serum | Healthy | Health examination | 16.3 |
| S#34 | Male | 44 | Serum | Healthy | Health examination | 14.7 | S#47 | Female | 40 | Serum | Healthy | Health examination | 10.9 |
| S#35 | Male | 50 | Serum | Healthy | Health examination | 13.9 | S#48 | Female | 53 | Serum | Healthy | Health examination | 20.8 |
| S#36 | Male | 54 | Serum | Healthy | Health examination | 8.5 | S#49 | Male | 63 | Serum | Healthy | Health examination | 23.9 |
| S#37 | Male | 56 | Serum | Healthy | Health examination | 9.8 | S#50 | Male | 47 | Serum | Healthy | Health examination | 18.3 |
| S#51 | Male | 53 | Serum | Healthy | Health examination | 11.6 | S#64 | Female | 69 | Serum | Silicosis | Chest radiography | 4.6 |
| S#52 | Male | 37 | Serum | Healthy | Health examination | 16.7 | S#65 | Male | 76 | Serum | Silicosis | Chest radiography | 2.5 |
| S#53 | Male | 52 | Serum | Healthy | Health examination | 13.50 | S#66 | Female | 77 | Serum | Silicosis | Chest radiography | 3.9 |
| S#54 | Male | 63 | Serum | Silicosis | Chest radiography | 6.3 | S#67 | Female | 69 | Serum | Silicosis | Chest radiography | 7.2 |
| S#55 | Female | 68 | Serum | Silicosis | Chest radiography | 7.6 | S#68 | Female | 66 | Serum | Silicosis | Chest radiography | 8.7 |
| S#56 | Male | 74 | Serum | Silicosis | Chest radiography | 9.3 | S#69 | Female | 71 | Serum | Silicosis | Chest radiography | 6.7 |
| S#57 | Female | 71 | Serum | Silicosis | Chest radiography | 4.2 | S#70 | Male | 79 | Serum | Silicosis | Chest radiography | 5.1 |
| S#58 | Female | 88 | Serum | Silicosis | Chest radiography | 8.6 | S#71 | Female | 77 | Serum | Silicosis | Chest radiography | 4.5 |
| S#59 | Male | 82 | Serum | Silicosis | Chest radiography | 3.7 | S#72 | Female | 49 | Serum | Silicosis | Chest radiography | 3.6 |
| S#60 | Female | 78 | Serum | Silicosis | Chest radiography | 6.2 | S#73 | Male | 52 | Serum | Silicosis | Chest radiography | 4.8 |
| S#61 | Female | 78 | Serum | Silicosis | Chest radiography | 2.9 | S#74 | Male | 77 | Serum | Silicosis | Chest radiography | 3.7 |
| S#62 | Male | 49 | Serum | Silicosis | Chest radiography | 9.1 | S#75 | Male | 73 | Serum | Silicosis | Chest radiography | 9.7 |
| S#63 | Male | 61 | Serum | Silicosis | Chest radiography | 8.2 | S#76 | Male | 72 | Serum | Silicosis | Chest radiography | 10.8 |
| S#77 | Female | 71 | Serum | Silicosis | Chest radiography | 7.6 | S#90 | Male | 80 | Serum | COPD | forced spirometry | 7.6 |
| S#78 | Female | 72 | Serum | Silicosis | Chest radiography | 3.4 | S#91 | Female | 75 | Serum | COPD | forced spirometry | 9.5 |
| S#79 | Male | 73 | Serum | Silicosis | Chest radiography | 4.6 | S#92 | Male | 82 | Serum | COPD | forced spirometry | 12.3 |
| S#80 | Male | 73 | Serum | Silicosis | Chest radiography | 5.9 | S#93 | Male | 70 | Serum | COPD | forced spirometry | 14.5 |
| S#81 | Female | 84 | Serum | Silicosis | Chest radiography | 8.3 | S#94 | Male | 58 | Serum | COPD | forced spirometry | 13.5 |
| S#82 | Male | 71 | Serum | Silicosis | Chest radiography | 6.7 | S#95 | Male | 71 | Serum | COPD | forced spirometry | 6.8 |
| S#83 | Male | 77 | Serum | Silicosis | Chest radiography | 5.1 | S#96 | Male | 62 | Serum | COPD | forced spirometry | 12.8 |
| S#84 | Male | 70 | Serum | Silicosis | Chest radiography | 3.6 | S#97 | Male | 74 | Serum | COPD | forced spirometry | 9.5 |
| S#85 | Male | 62 | Serum | Silicosis | Chest radiography | 4.7 | S#98 | Female | 85 | Serum | COPD | forced spirometry | 8.6 |
| S#86 | Male | 60 | Serum | Silicosis | Chest radiography | 5.5 | S#99 | Male | 67 | Serum | COPD | forced spirometry | 9.2 |
| S#87 | Female | 73 | Serum | COPD | forced spirometry | 13.2 | S#100 | Male | 70 | Serum | COPD | forced spirometry | 10.5 |
| S#88 | Male | 73 | Serum | COPD | forced spirometry | 9.3 | S#101 | Male | 84 | Serum | COPD | forced spirometry | 7.2 |
| S#89 | Male | 75 | Serum | COPD | forced spirometry | 11.2 | S#102 | Male | 70 | Serum | COPD | forced spirometry | 6.3 |
| S#103 | Male | 65 | Serum | COPD | forced spirometry | 8.5 | S#116 | Male | 57 | Serum | COPD | forced spirometry | 10.4 |
| S#104 | Male | 85 | Serum | COPD | forced spirometry | 9.6 | S#117 | Female | 81 | Serum | COPD | forced spirometry | 7.2 |
| S#105 | Female | 67 | Serum | COPD | forced spirometry | 10.6 | S#118 | Male | 74 | Serum | COPD | forced spirometry | 5.7 |
| S#106 | Male | 78 | Serum | COPD | forced spirometry | 14.2 | S#119 | Male | 71 | Serum | COPD | forced spirometry | 12.6 |
| S#107 | Female | 83 | Serum | COPD | forced spirometry | 15.1 | S#120 | Male | 71 | Serum | COPD | forced spirometry | 7.9 |
| S#108 | Male | 61 | Serum | COPD | forced spirometry | 9.8 | S#121 | Male | 77 | Serum | COPD | forced spirometry | 9.7 |
| S#109 | Female | 79 | Serum | COPD | forced spirometry | 8.90 | S#122 | Female | 78 | Serum | COPD | forced spirometry | 8.4 |
| S#110 | Female | 67 | Serum | COPD | forced spirometry | 7.9 | S#123 | Male | 66 | Serum | COPD | forced spirometry | 8.3 |
| S#111 | Female | 42 | Serum | COPD | forced spirometry | 11.8 | S#124 | Male | 60 | Serum | COPD | forced spirometry | 10.4 |
| S#112 | Female | 53 | Serum | COPD | forced spirometry | 10.7 | S#125 | Male | 71 | Serum | COPD | forced spirometry | 12.5 |
| S#113 | Male | 82 | Serum | COPD | forced spirometry | 6.9 | S#126 | Male | 68 | Serum | Pulmonary sarcoidsis | biopsy | 18.1 |
| S#114 | Male | 81 | Serum | COPD | forced spirometry | 7.7 | S#127 | Female | 72 | Serum | Pulmonary sarcoidsis | biopsy | 16.2 |
| S#115 | Female | 75 | Serum | COPD | forced spirometry | 13.4 | S#128 | Female | 74 | Serum | Pulmonary sarcoidsis | biopsy | 24.5 |
| S#129 | Female | 71 | Serum | Pulmonary sarcoidsis | biopsy | 22.1 | S#142 | Male | 57 | Serum | Pulmonary sarcoidsis | biopsy | 20.8 |
| S#130 | Male | 80 | Serum | Pulmonary sarcoidsis | biopsy | 25.3 | S#143 | Female | 55 | Serum | Pulmonary sarcoidsis | biopsy | 17.5 |
| S#131 | Female | 82 | Serum | Pulmonary sarcoidsis | biopsy | 19.5 | S#144 | Male | 68 | Serum | Pulmonary sarcoidsis | biopsy | 26.9 |
| S#132 | Male | 70 | Serum | Pulmonary sarcoidsis | biopsy | 17.2 | S#145 | Female | 53 | Serum | Pulmonary sarcoidsis | biopsy | 24.3 |
| S#133 | Male | 58 | Serum | Pulmonary sarcoidsis | biopsy | 19.6 | S#146 | Female | 28 | Serum | Pulmonary sarcoidsis | biopsy | 16.2 |
| S#134 | Male | 71 | Serum | Pulmonary sarcoidsis | biopsy | 12.5 | S#147 | Female | 43 | Serum | Pulmonary sarcoidsis | biopsy | 19.8 |
| S#135 | Male | 79 | Serum | Pulmonary sarcoidsis | biopsy | 20.6 | S#148 | Female | 67 | Serum | Pulmonary sarcoidsis | biopsy | 22.60 |
| S#136 | Male | 67 | Serum | Pulmonary sarcoidsis | biopsy | 19.5 | S#149 | Female | 58 | Serum | Pulmonary sarcoidsis | biopsy | 24.3 |
| S#137 | Female | 42 | Serum | Pulmonary sarcoidsis | biopsy | 18.7 | S#150 | Male | 47 | Serum | Pulmonary sarcoidsis | biopsy | 19.2 |
| S#138 | Male | 53 | Serum | Pulmonary sarcoidsis | biopsy | 23.6 | S#151 | Male | 49 | Serum | Pulmonary sarcoidsis | biopsy | 18.3 |
| S#139 | Male | 48 | Serum | Pulmonary sarcoidsis | biopsy | 19.6 | S#152 | Female | 72 | Serum | Pulmonary sarcoidsis | biopsy | 21.6 |
| S#140 | Female | 35 | Serum | Pulmonary sarcoidsis | biopsy | 27.1 | S#153 | Male | 52 | Serum | Pulmonary sarcoidsis | biopsy | 25.7 |
| S#141 | Female | 63 | Serum | Pulmonary sarcoidsis | biopsy | 24.4 | S#154 | Male | 39 | Serum | Pulmonary sarcoidsis | biopsy | 17.99 |
| S#155 | Male | 61 | Serum | Pulmonary sarcoidsis | biopsy | 20.7 | S#161 | Male | 57 | Serum | Pulmonary sarcoidsis | biopsy | 27.5 |
| S#156 | Male | 82 | Serum | Pulmonary sarcoidsis | biopsy | 21.6 | S#162 | Female | 66 | Serum | Pulmonary sarcoidsis | biopsy | 26.3 |
| S#157 | Male | 46 | Serum | Pulmonary sarcoidsis | biopsy | 22.3 | S#163 | Male | 61 | Serum | Pulmonary sarcoidsis | biopsy | 25.7 |
| S#158 | Female | 73 | Serum | Pulmonary sarcoidsis | biopsy | 20.7 | S#164 | Male | 49 | Serum | Pulmonary sarcoidsis | biopsy | 21.6 |
| S#159 | Male | 59 | Serum | Pulmonary sarcoidsis | biopsy | 26.8 | S#165 | Male | 53 | Serum | Pulmonary sarcoidsis | biopsy | 20.41 |
| S#160 | Male | 47 | Serum | Pulmonary sarcoidsis | biopsy | 19.6 | S#166 | Female | 67 | Serum | Pulmonary sarcoidsis | biopsy | 23.4 |

**Reference**

1. McHugh ML. Interrater reliability: the kappa statistic. Biochem Med 2012;22:276-82.
2. Bernard A, Lauwerys R, Noel A, Vandeleene B, Lambert A. Determination by latex immunoassay of protein 1 in normal and pathological urine. Clin Chim Acta 1991;201:231-45.
3. Dimic A, Peric A, Grgurevic U, Sotirovic J, Labus M, Baletic N, et al. Different levels of mucus inflammatory mediators in nasal polyposis with and without aeroallergen sensitivity. Laryngoscope Investigative Otolaryngology 2022;7:671-678.
